# Supplementary material for: Mixed ligand copper(ii) dicarboxylate complexes: the role of co-ligand hydrophobicity in DNA binding, double-strand DNA cleavage, protein binding and cytotoxicity
Source: Royal Society of Chemistry journal article supplement (doi:10.1039/c4dt03879g), 2015-01-01
Supplement: c4dt03879g1.pdf [file c4dt03879g1.pdf]

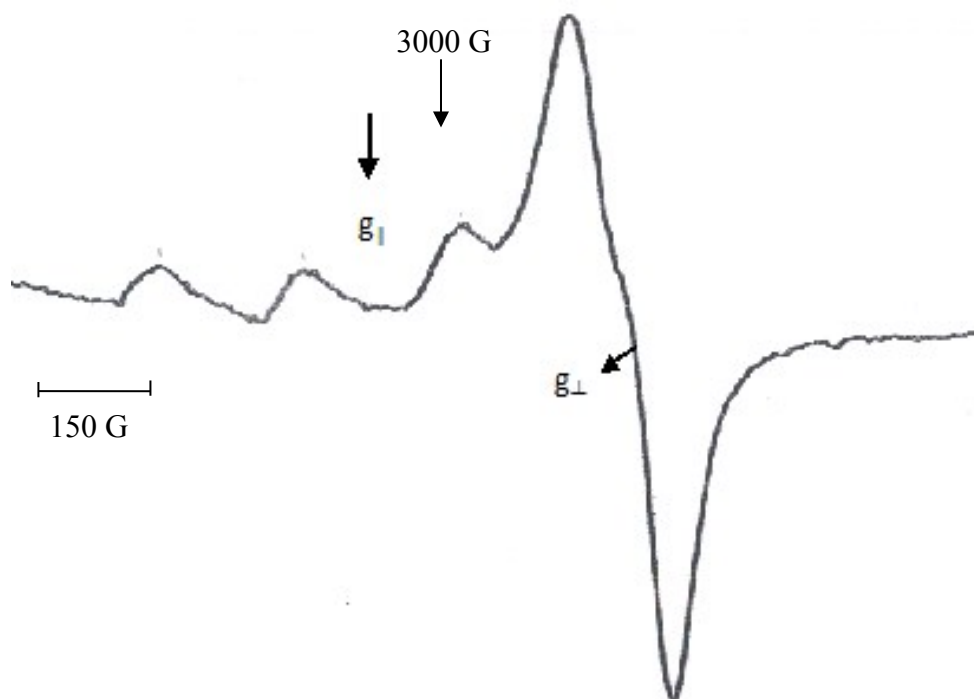

**Figure S1** X-band EPR spectra of [Cu(bimda)(phen)] **2** in 5 mM Tris-HCl/50 mM NaCl buffer (pH 7.1):acetone (4:1 v/v) glass at 77 K. Microwave frequency 9.0753 GHz

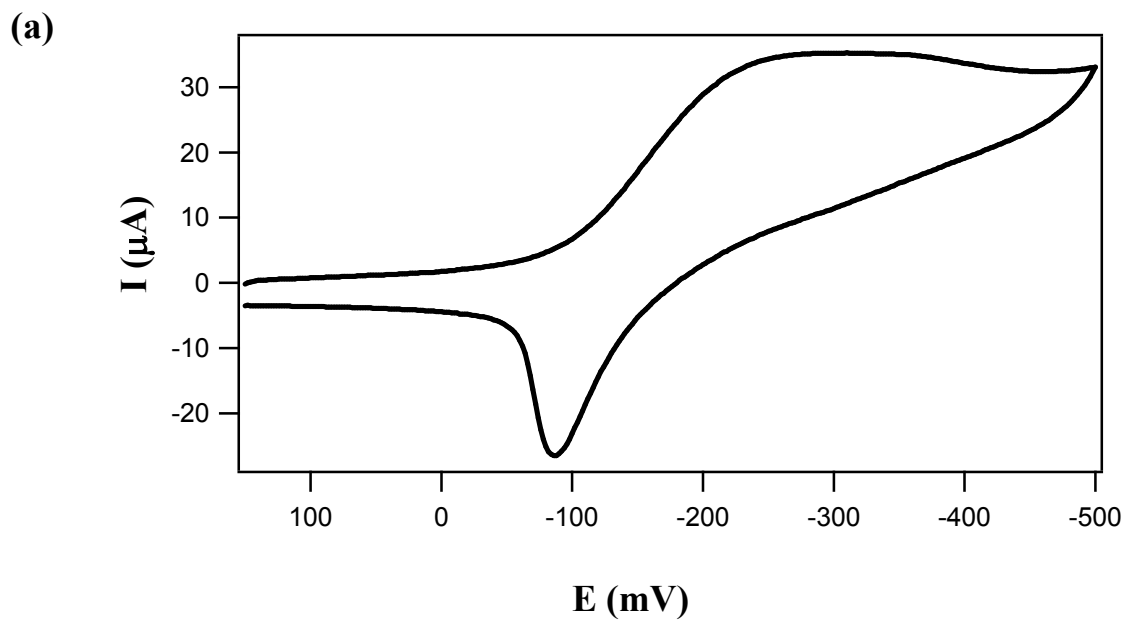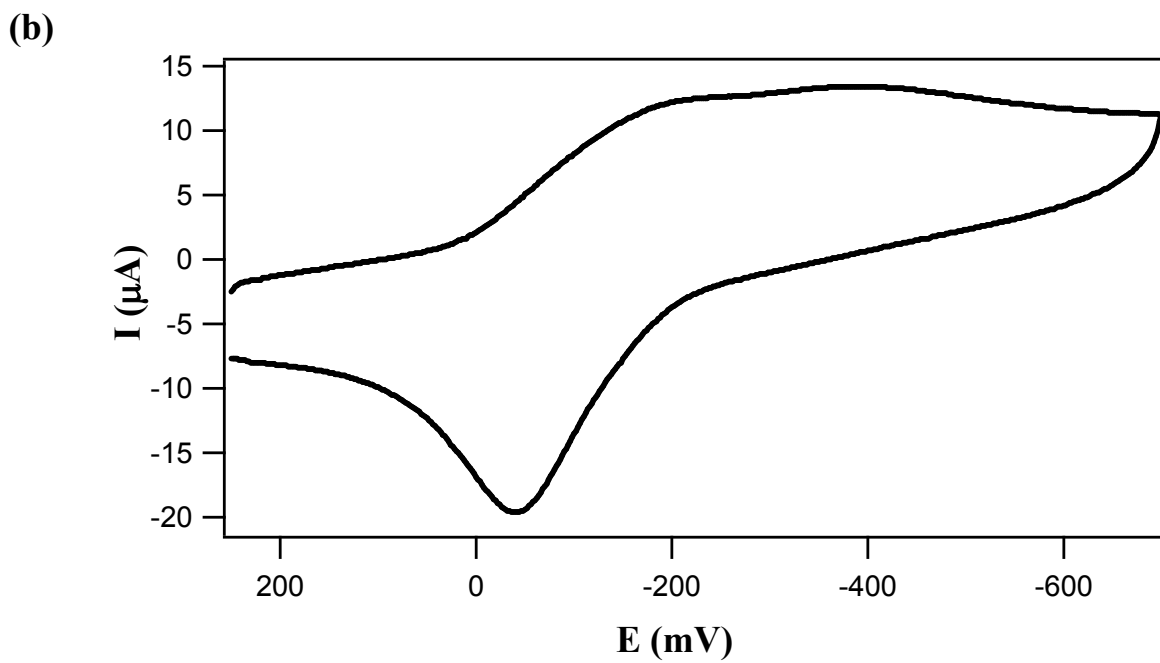

**Figure S2** Cyclic voltammograms of (a) [Cu(bimda)(bpy)] **1** (0.5 mM) and (b) [Cu(bimda)(phen)] **2** (0.5 mM) in methanol at 25 °C at 50 mVs<sup>-1</sup> scan rate

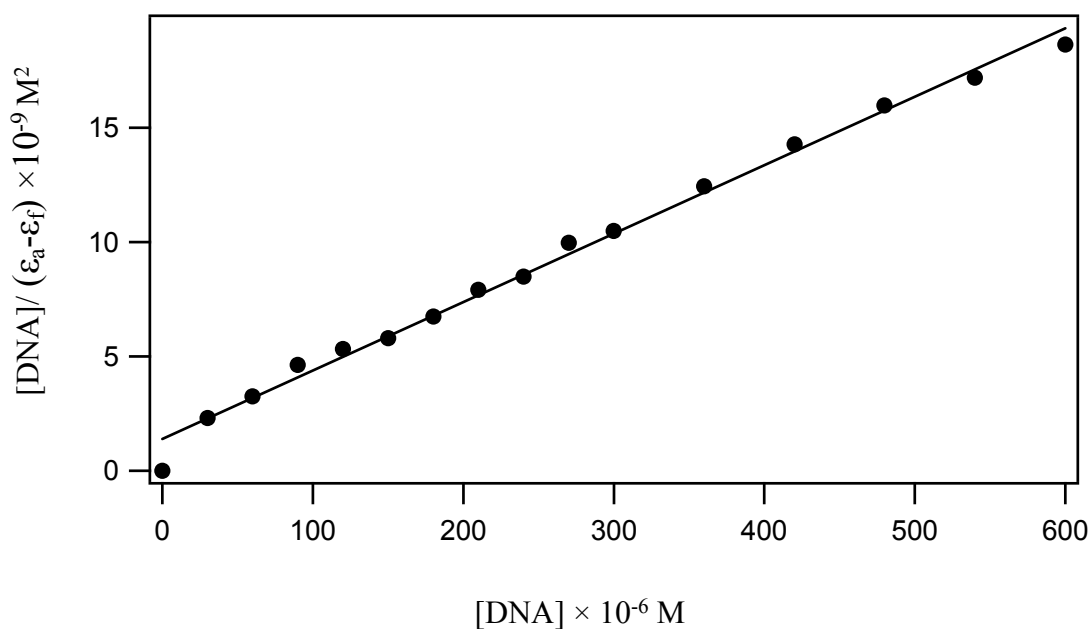

**Figure S3.** The plot of [DNA] vs.  $[DNA]/(\epsilon_a - \epsilon_b)$  at  $R = 25$  of the complex [Cu(bimda)(phen)]

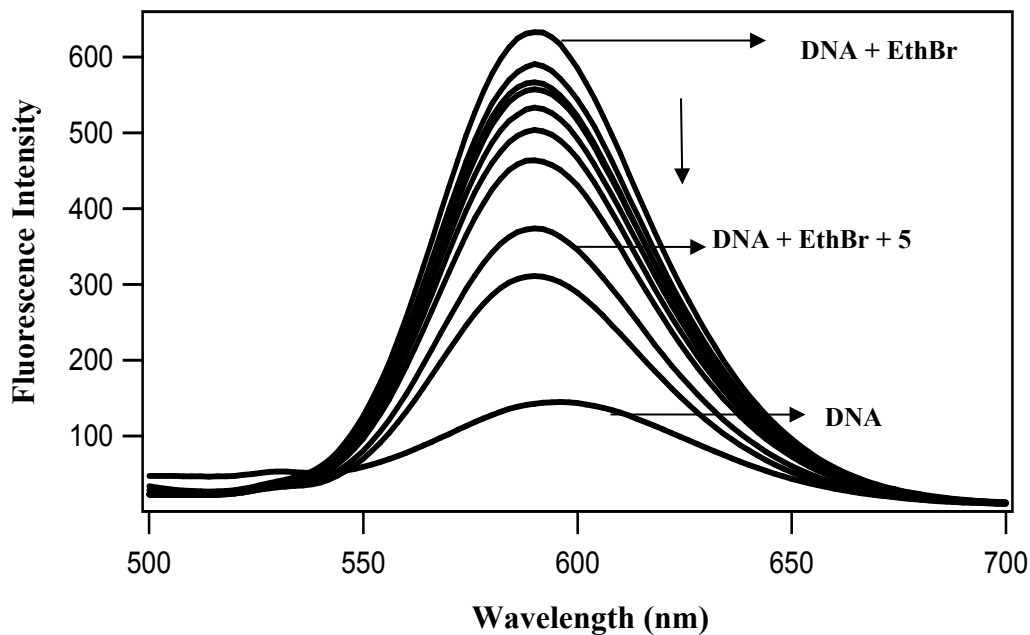

**Figure S4.** Effect of addition of the complex **5** on the emission intensity of the CT DNA-bound ethidium bromide (12.5  $\mu\text{M}$ ) at different complex concentrations in a 5 mM Tris-HCl/50 mM NaCl buffer at pH 7.1 and at 25  $^{\circ}\text{C}$

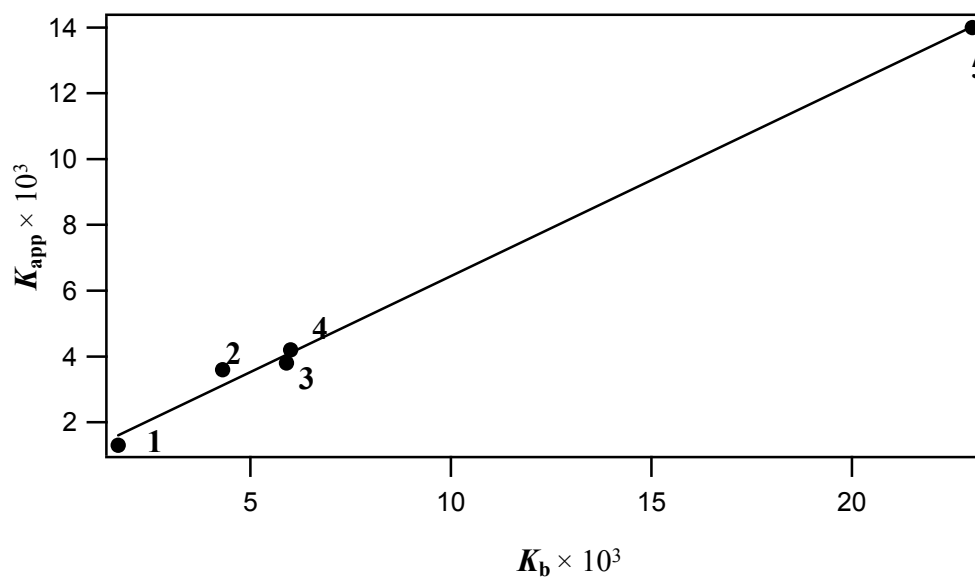

**Figure S5.** Plot of  $K_{\text{app}}$  vs  $K_{\text{b}}$

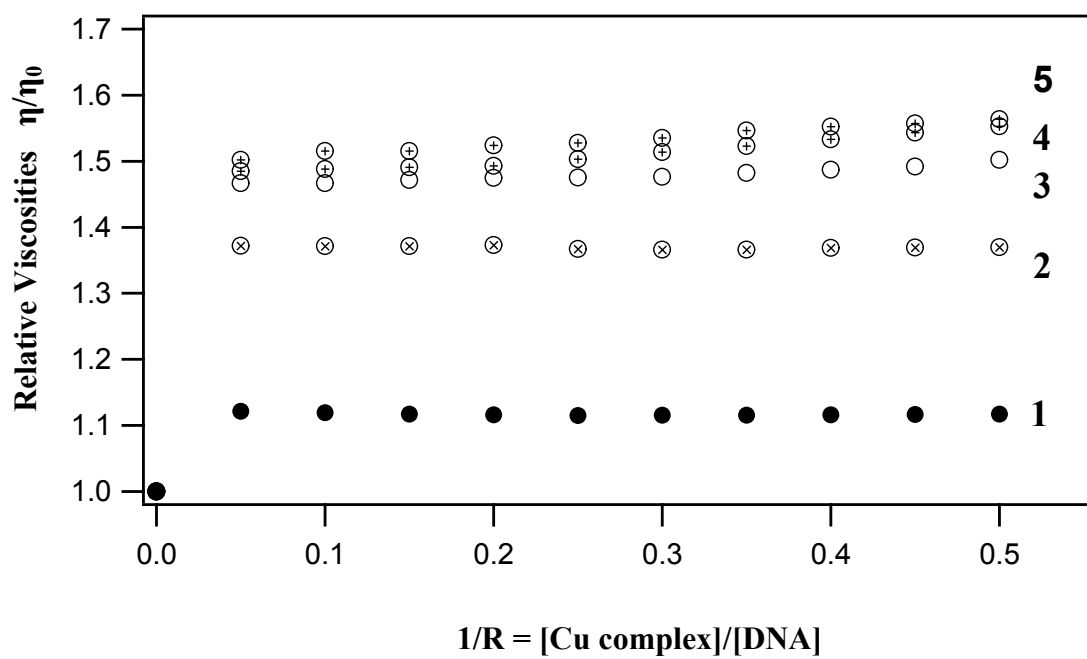

**Figure S6.** Effect of addition of complexes **1 – 5** to CT DNA; The relative viscosities vs  $1/R$ ; [CT DNA],  $500 \mu\text{M}$

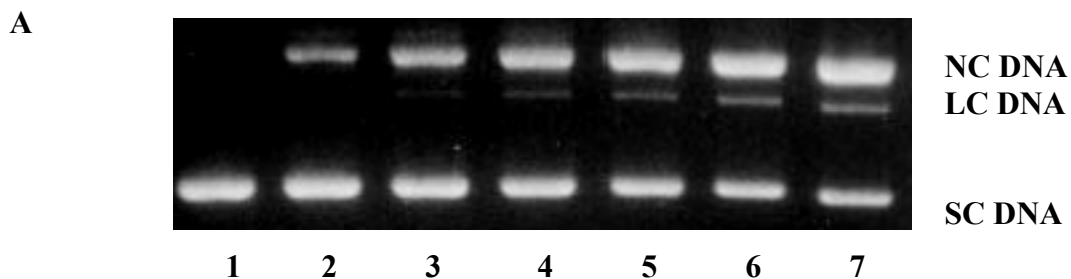

**Figure S7A.** Time dependent cleavage of supercoiled pUC19 DNA (40  $\mu$ M) by the complex **5** (100  $\mu$ M) in 5 mM Tris-HCl/50 mM NaCl at pH = 7.1 and at 37  $^{\circ}$ C Lane 1, DNA; Lane 2, DNA + **5** (10 min); Lane 3, DNA + **5** (20 min); Lane 4, DNA + **5** (30 min); Lane 5, DNA + **5** (40 min); Lane 6, DNA + **5** (50 min); Lane 7, DNA + **5** (60 min). Forms SC, NC and LC are Supercoiled, Nicked Circular and Linear Circular DNA respectively

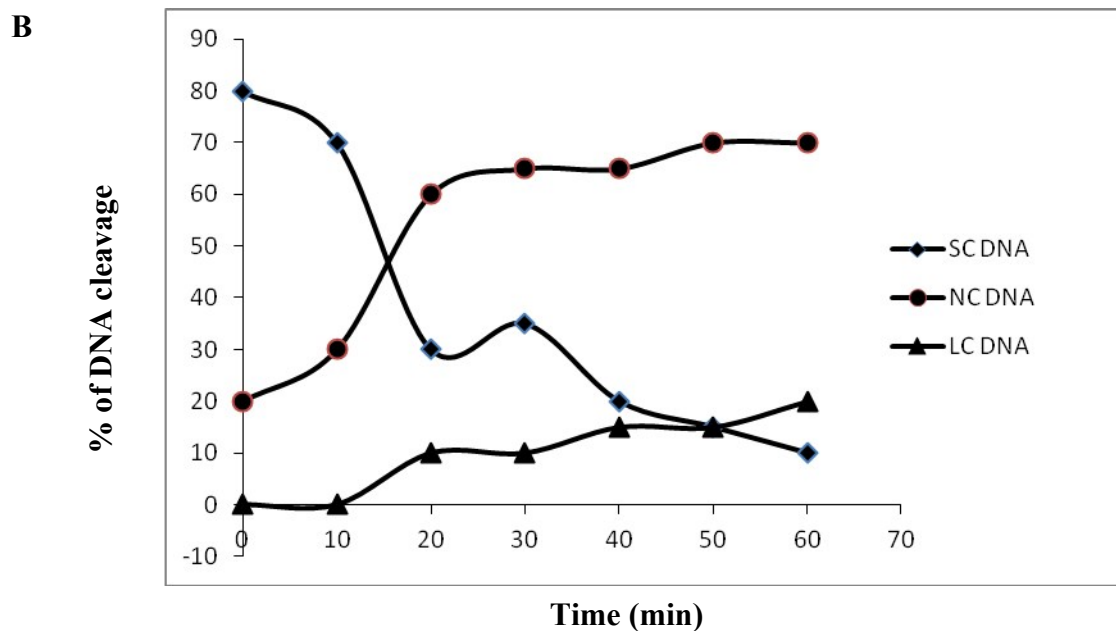

**Figure S7B.** Plot shows % DNA cleavage vs. time of incubation (0 – 60 min) for complex **5** (100  $\mu$ M)

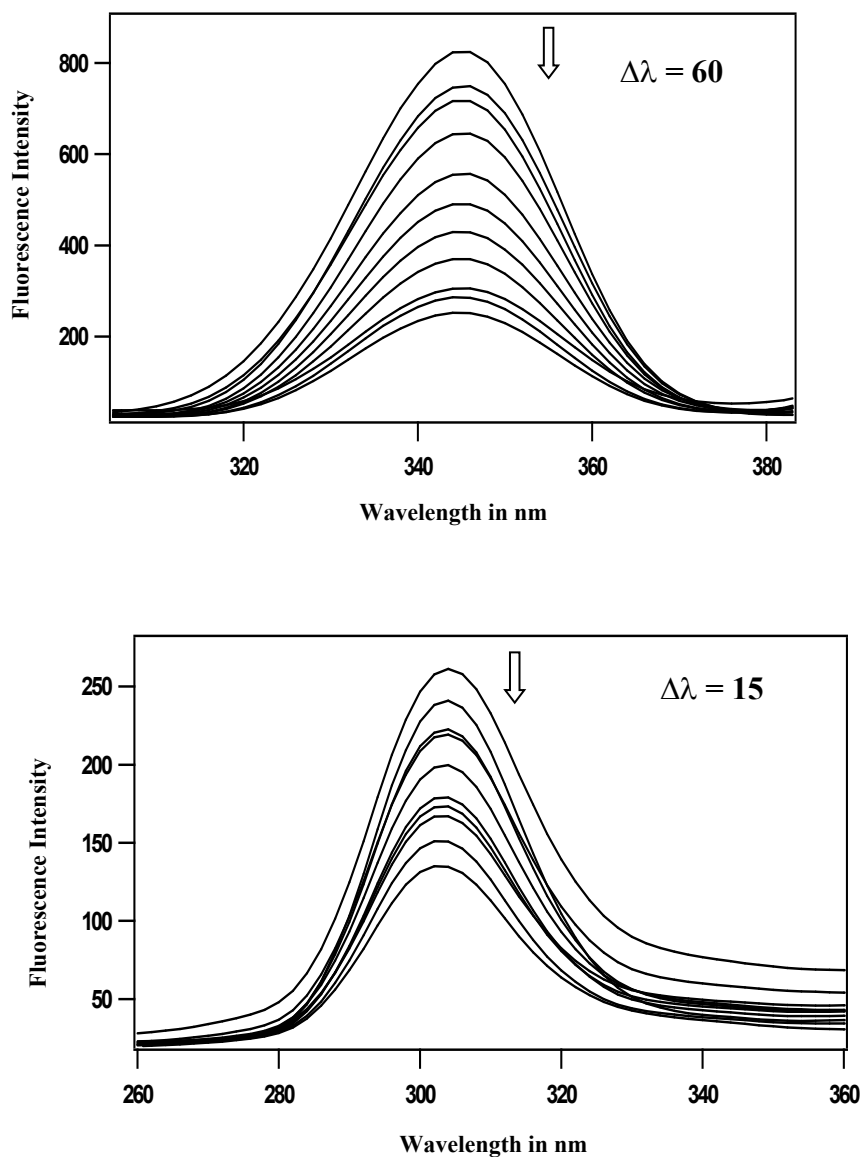

**Figure S8.** Synchronous fluorescence spectra of BSA upon the addition of [Cu(bimda)(5,6-dmp)] **3** (0 - 50  $\mu\text{M}$ ) when the  $\Delta\lambda$  between excitation wavelength and emission wavelength was fixed at 60 and 15 nm, at 298 K; [BSA] = 5  $\mu\text{M}$ .

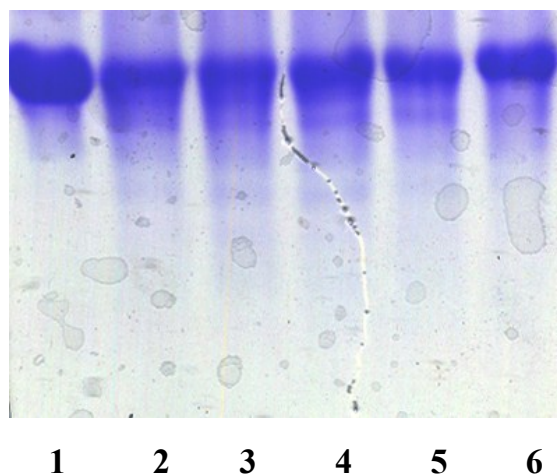

**Figure S9.** SDS-PAGE diagram of cleavage of bovine serum albumin (BSA, 4  $\mu\text{M}$ ) by complex **1** - **5** (500  $\mu\text{M}$ ) in 5 mM Tris-HCl/50 mM NaCl buffer at pH = 7.1 at 50  $^{\circ}\text{C}$  with an incubation time of 3 h. Lane 1, BSA; Lane 2, BSA + **1**; Lane 3, BSA + **2**; Lane 4, BSA + **3**; Lane 5, BSA + **4**; Lane 6, BSA + **5**

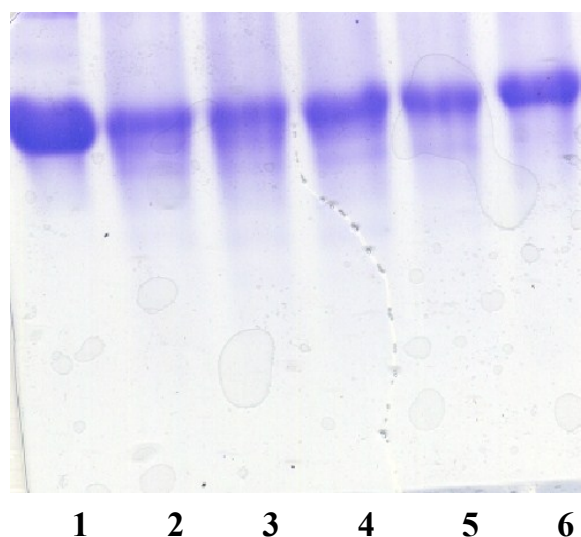

**Figure S10.** SDS-PAGE diagram of cleavage of bovine serum albumin (BSA, 4  $\mu\text{M}$ ) by complex **1** - **5** (500  $\mu\text{M}$ ) in 5 mM Tris-HCl/50 mM NaCl buffer at pH = 7.1 and in the presence of hydrogen peroxide ( $\text{H}_2\text{O}_2$ , 500  $\mu\text{M}$ ) at 50  $^{\circ}\text{C}$  with an incubation time of 3 h. Lane 1, BSA +  $\text{H}_2\text{O}_2$ ; Lane 2, BSA +  $\text{H}_2\text{O}_2$  + **1**; Lane 3, BSA +  $\text{H}_2\text{O}_2$  + **2**; Lane 4, BSA +  $\text{H}_2\text{O}_2$  + **3**; Lane 5, BSA +  $\text{H}_2\text{O}_2$  + **4**; Lane 6, BSA +  $\text{H}_2\text{O}_2$  + **5**.



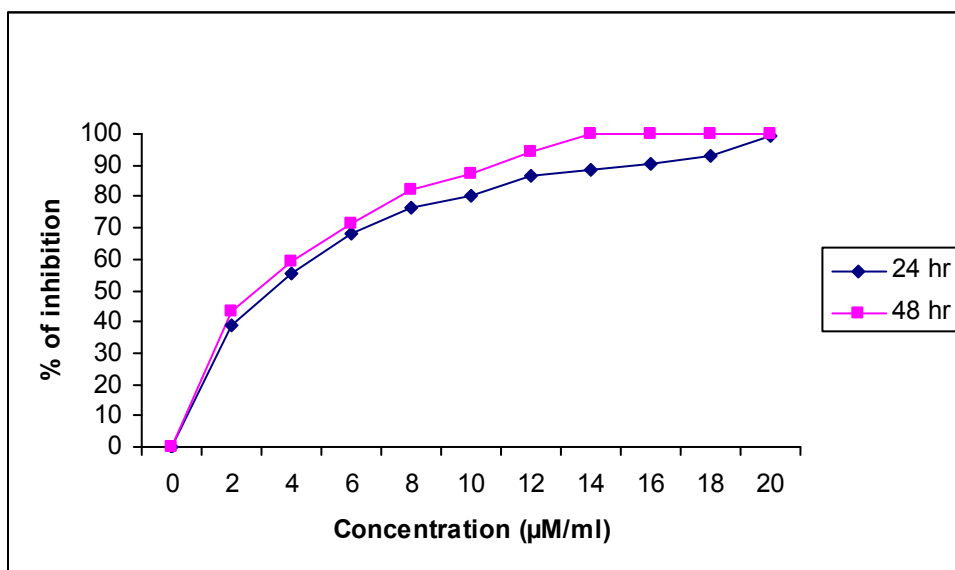

**Figure S11.** Growth inhibitory effects of [Cu(bimda)(3,4,7,8-tmp)] **4** on MCF-7 breast cancer cell lines for 24 and 48 h, cell viability was measured by the MTT Assay. Each data points represents the mean of three separate experiments

**Table S1.** Electronic absorption<sup>a</sup> spectral properties of Cu(II) complexes

| Complex                           | $\lambda_{\max}$ in nm ( $\epsilon$ , M <sup>-1</sup> cm <sup>-1</sup> ) |                          |
|-----------------------------------|--------------------------------------------------------------------------|--------------------------|
|                                   | Ligand field <sup>b</sup>                                                | Ligand based             |
| [Cu(bimda)(bpy)] <b>1</b>         | 687(30)                                                                  | 298(9460) <sup>c</sup>   |
| [Cu(bimda)(phen)] <b>2</b>        | 670(44)                                                                  | 272(31290) <sup>d</sup>  |
| [Cu(bimda)(5,6-dmp)] <b>3</b>     | 662(41)                                                                  | 278 (19610) <sup>c</sup> |
| [Cu(bimda)(3,4,7,8-tmp)] <b>4</b> | 667(40)                                                                  | 279(16160) <sup>c</sup>  |
| [Cu(bimda)(dpq)] <b>5</b>         | 674(41)                                                                  | 251(24770) <sup>e</sup>  |

<sup>a</sup>In 5 mM Tris-HCl/50 mM NaCl buffer solution at pH 7.1

<sup>b</sup>Concentration,  $5 \times 10^{-3}$  M ; <sup>c</sup>Concentration,  $20 \times 10^{-6}$  M ; <sup>d</sup>Concentration,  $40 \times 10^{-6}$  M ;

<sup>e</sup>Concentration,  $60 \times 10^{-6}$  M;

**Table S2.** EPR spectral properties<sup>a</sup> of Cu(II) complexes

| Complexes                         | $g_{\parallel}$ | $A_{\parallel}$ | $g_{\parallel}/A_{\parallel}$ | $g_{\perp}$ |
|-----------------------------------|-----------------|-----------------|-------------------------------|-------------|
|                                   |                 |                 |                               |             |
| [Cu(bimda)(bpy)] <b>1</b>         | 2.252           | 181             | 124                           | 2.063       |
| [Cu(bimda)(phen)] <b>2</b>        | 2.256           | 182             | 124                           | 2.062       |
| [Cu(bimda)(5,6-dmp)] <b>3</b>     | 2.257           | 180             | 125                           | 2.060       |
| [Cu(bimda)(3,4,7,8-tmp)] <b>4</b> | 2.257           | 183             | 123                           | 2.063       |
| [Cu(bimda)(dpq)] <b>5</b>         | 2.258           | 180             | 125                           | 2.064       |

<sup>a</sup>In 5 mM Tris-HCl/50 mM NaCl buffer (pH 7.1):acetone (4:1 V/V) glass at 77 K

**Table S3.** Electrochemical data of Cu(II) complexes

| Complex                           | $E_{pa}$ (mV) | $E_{pc}$ (mV) | $\Delta E_p$ (mV) | $E_{1/2}$ (V)   |                  |
|-----------------------------------|---------------|---------------|-------------------|-----------------|------------------|
|                                   |               |               |                   | CV <sup>a</sup> | DPV <sup>b</sup> |
| [Cu(bimda)(bpy)] <b>1</b>         | -90.0         | -280.0        | 110               | -0.185          | -0.168           |
| [Cu(bimda)(phen)] <b>2</b>        | -20.0         | -200.0        | 180               | -0.110          | -0.105           |
| [Cu(bimda)(5,6-dmp)] <b>3</b>     | -84.0         | -278.0        | 194               | -0.181          | -0.176           |
| [Cu(bimda)(3,4,7,8-tmp)] <b>4</b> | -80.0         | -260.0        | 180               | -0.170          | -0.153           |
| [Cu(bimda)(dpq)] <b>5</b>         | 10.0          | -180.0        | 170               | -0.085          | -0.065           |

<sup>a</sup>Measured vs. non-aqueous Ag/Ag<sup>+</sup> reference electrode; add 544 mV [300 mV, Ag/Ag<sup>+</sup> to SCE + 244 mV, SCE to SHE] to convert to standard hydrogen electrode (SHE); Fc/Fc<sup>+</sup> couple,  $E_{1/2}$ , 0.039 V (CV); 0.042 (DPV), Scan rate 50 mV s<sup>-1</sup>; Supporting electrolyte, *Tetra-N*-butylammonium perchlorate mol dm<sup>-3</sup>; Complex concentration, 0.5 mmol.dm<sup>-3</sup>; <sup>b</sup>Differential Pulse Voltammetry, scan rate 5 mVs<sup>-1</sup>; pulse height 25 mV.
